# Supplementary material
Source: PubMed Central journal article supplement (PMC4345449)
Supplement: rspb20142778supp1.pdf [file rspb20142778supp1.pdf]

**Supplementary Material:** Yant L et al. Molecular basis for three-dimensional elaboration of the *Aquilegia* petal spur.

### Supplementary Methods

**Identification of additional candidate genes.** Nine *Aquilegia* homologs of the KNOX homeodomain family were identified: Aquca\_002\_00078.1, Aquca\_002\_00080.1, Aquca\_003\_00549.1 (*AqKXL1*), Aquca\_012\_00046.1 (*AqSTMI*), Aquca\_013\_00468.2 (*AqKXL3*), Aquca\_016\_00110.1 (*AqKXL4*), Aquca\_032\_00056.1, Aquca\_032\_00057.1 and Aquca\_133\_00021.1 (*AqKN*). The pairs of Aquca\_002\_00078.1/Aquca\_002\_00080.1 and Aquca\_032\_00056.1/Aquca\_032\_00057.1 appear to represent the respective 5' and 3' ends of single loci (termed *AqKXL2* and *AqSTM2*, respectively) that correspond to separate ESTs. In both cases, manual examination of the genome sequence allowed prediction of a contiguous reading frame, which was confirmed using RT-PCR followed by Sanger sequencing. For the TCP genes, we identified thirteen annotated loci as TCP family members but only three of these fall into class I of the TCP-C subfamily based on characteristics outlined in Navaud et al. 2007 (24): Aquca\_005\_00099 (*AqTCP4*), Aquca\_057\_00119.1 (*AqTCP5*) and Aquca\_002\_00878.1 (*AqTCP2*). In order to establish orthology of all these sequences, phylogenetic analyses were performed using RAxML on amino acid alignments of KNOX and TCP family homologs from across the angiosperms (electronic supplementary material, figure S2). The highly supported clades in each tree are generally consistent with canonical angiosperm relationships, with representation from both monocots and dicots. Clearly, both of these families have experienced multiple ancient duplication events that gave rise to various broadly represented lineages. The predicted KNOX and TCP cDNAs are deposited in GenBank under accession numbers KC854334-KC854336 and KP331533-KP331539.

### ***AqSTMI* expression is localized to actively dividing regions of meristems and compound leaves but not petals**

Our first step in characterizing the *Aquilegia AqSTMI* locus was to examine its expression in vegetative apices and developing compound leaves. We used *in situ* hybridization of *AqHIS4* to determine the correspondence between *AqSTMI* expression and localized cell divisions. Consistent with what has been found in other dicots, we observed close association between the localization of *AqHIS4* and *AqSTMI* in both the shoot apical meristem and early developing compound leaves, especially the tips of early primordia and leaflets of older leaves (electronic supplementary material, figure S3a-c and d-f). The one exception to this overlap was the down-regulation of *AqSTMI* in the flanks of some meristem sections (electronic supplementary material, figure S3f). This indicates that *AqSTMI* is down-regulated in incipient leaf primordia but then is quickly reactivated once compound leaf development begins.

The next step was to determine whether the association of *AqSTMI* expression with regions of prolonged cell division would also be observed in petals. Hybridization to inflorescences revealed broad expression in young stage 2 floral buds in which no primordia had initiated (electronic supplementary material, figure S4a). By stage 3, when sepal primordia had formed, the signal is restricted to the internal region of the meristem with no signal in the young sepals (electronic supplementary material, figure S4b).

Similarly, *AqSTMI* progressively disappears from the petal, stamen and staminodium primordia as they are formed, but can still be detected in the apical domain of the floral meristem until it is finally consumed by carpel initiation (electronic supplementary material, figure S4c). No expression is observed in developing petals (electronic supplementary material, figure S4d-g). The expression of *AqKN* is very similar to that observed for *AqSTMI* (electronic supplementary material, figure S5).

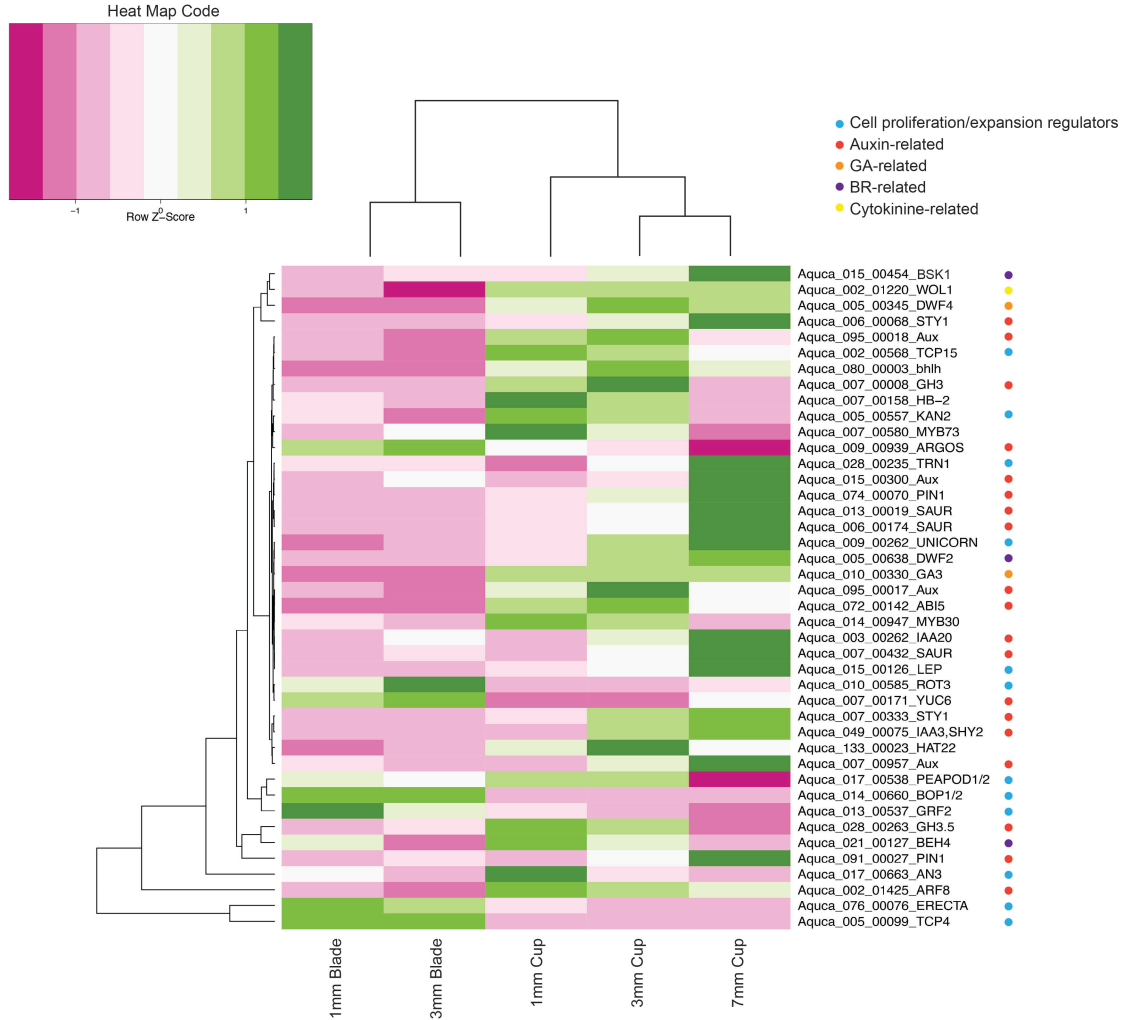

| Gene Name       | Locus                  | 1mmC | 1mmB | 3mmC | 3mmB | 7mmC |
|-----------------|------------------------|------|------|------|------|------|
| <i>AqSTM1</i>   | Aquca_012_00046.1      |      |      |      |      |      |
| <i>AqSTM2</i>   | Aquca_032_00056.1/57.1 |      |      |      |      |      |
| <i>AqKN</i>     | Aquca_133_00021.1      |      |      |      |      |      |
| <i>AqKXL1</i>   | Aquca_003_00549.1      | 1    | 2    | 1    | 1    | 0    |
| <i>AqKXL2</i>   | Aquca_002_00078.1/80.1 |      |      |      |      |      |
| <i>AqTCP4</i>   | Aquca_005_00099        | 305  | 1063 | 270  | 984  | 179  |
| <i>AqAN3</i>    | Aquca_017_00663        | 693  | 272  | 129  | 54   | 20   |
| <i>AqARF3</i>   | Aquca_036_00025        | 192  | 91   | 237  | 156  | 501  |
| <i>AqERECTA</i> | Aquca_076_00076        | 485  | 1480 | 279  | 1205 | 184  |
| <i>AqAP3-3</i>  | Aquca_007_00336        | 234  | 227  | 281  | 269  | 502  |
| <i>AqAG1</i>    | Aquca_136_0010.1/09.1  |      |      |      |      |      |

**Figure S1.** Expression of selected genes discussed in the text and coregulated family members. Heat map shows clustered cpm values for each tissue sample after averaging biological triplicates. Each locus is marked with a colored dot to indicate its associated developmental module, as inferred by homology to *Arabidopsis* sequences. The table shows cpm values for all five type I KNOX genes as compared to other DE loci that are

more highly expressed. For reference, we also included an organ identity gene known to control petal identity, *AqAP3-3*, and one that does not, *AqAG1*. Clustering was performed with the heatmap function in R3.1.

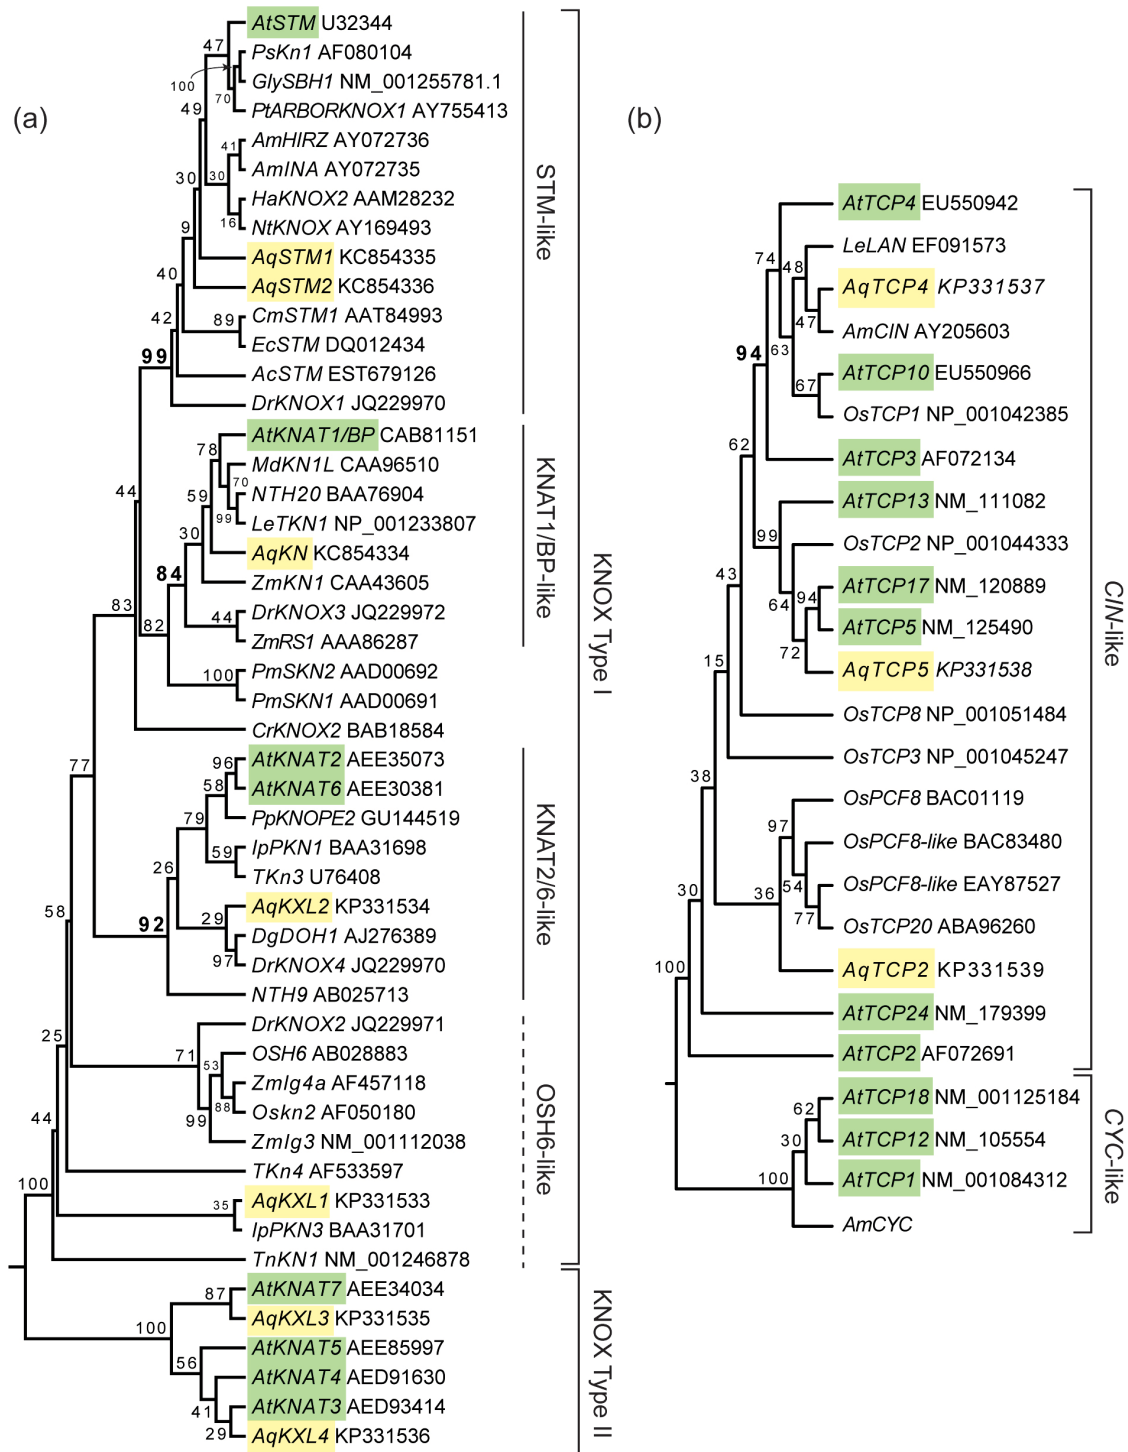

**Figure S2.** Phylogenetic analysis of *Aquilegia* KNOX and TCP family members (a)

Maximum likelihood analysis of type I KNOX gene homologs with ML bootstrap values shown at the nodes. Type II KNOX sequences are used as outgroup. Critical support

values for *STM* and *KN* clades are shown in bold. (b) Maximum likelihood analysis of *CIN*-like TCP gene homologs with ML bootstrap values shown at the nodes. *CYC*-like TCP sequences are used as outgroup. Critical support value for *TCP4* clade is shown in bold. Key to taxonomic abbreviations: Ac = *Allium cepa*; Am = *Antirrhinum majus*; At = *Arabidopsis thaliana*; Aq = *Aquilegia coerulea* ‘Origami’; Cm = *Chelidonium majus*; Cr = *Ceratopteris richardii*; Dg = *Dendrobium* grex Madame Thong-In; Gly = *Glycine max*; Ha = *Helianthus annuus*; Ip = *Ipomoea nil*; Le = *Lycopersicon esculentum*; Md = *Malus domestica*; Nt = *Nicotiana tabacum*; Os = *Oryza sativa*; Pm = *Picea mariana*; Ps = *Pisum sativa*; Pt = *Populus tremula*; Zm = *Zea mays*. All loci are followed by their GenBank accession numbers.

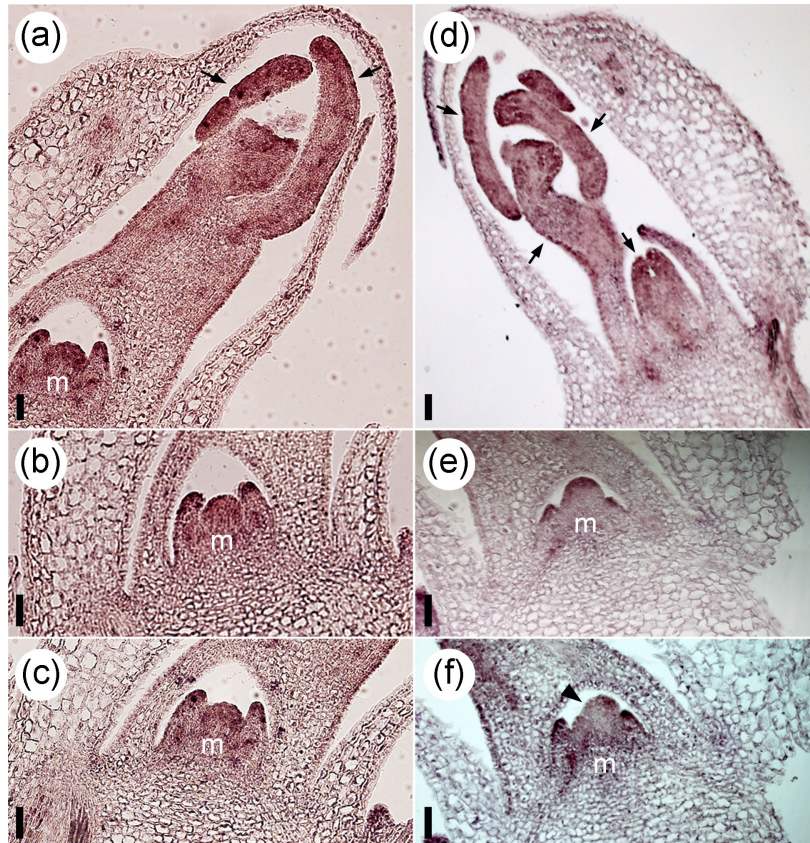

**Figure S3.** *AqHIS4* and *AqSTM* expression in young leaves and vegetative meristems. (a-c) *AqHIS4* expression as a marker of cell division. Signal is detected in the apical meristem (m) and in developing leaflets (arrows). (d-f) *AqSTM* expression is detected in the distal regions of complex leaves (arrows in d) and in the shoot apical meristem (m in e-f). *AqSTM* expression appears to be down-regulated in the flanks of the meristem in some cases (arrowhead in f), most likely in association with the initiation of new leaf primordia. Size bars = 100  $\mu$ m.

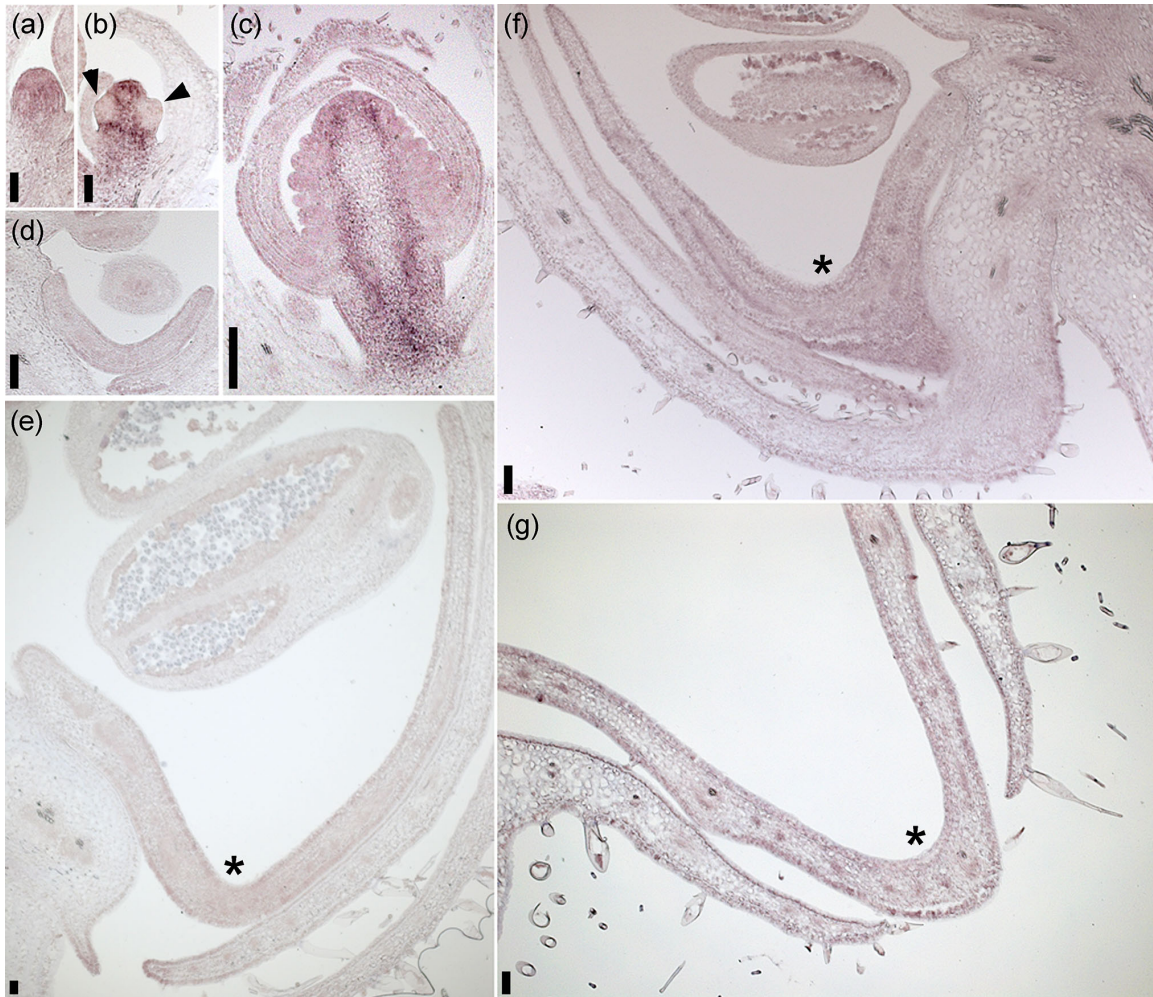

**Figure S4.** *AqSTM* expression in developing floral meristems and petal primordia. (a) Stage 1 floral meristem. (b) Stage 3 floral meristem showing down-regulation of *AqSTM* in the incipient sepals (arrowheads). (c) Stage 6 floral meristem. *AqSTM* is absent from primordia but still detectable at apex where carpel initiation is yet to occur. (d) Petal primordium from a stage 8 meristem. (e) Petal primordium from a stage 10 meristem. (f) Petal primordium from an early stage 11 meristem. (g) Petal primordium from a late



stage 11 meristem. Asterisks in *f-g* indicate the developing nectar spur. Size bars = 50  $\mu\text{m}$  in *a-b*, 100  $\mu\text{m}$  in *c-g*.

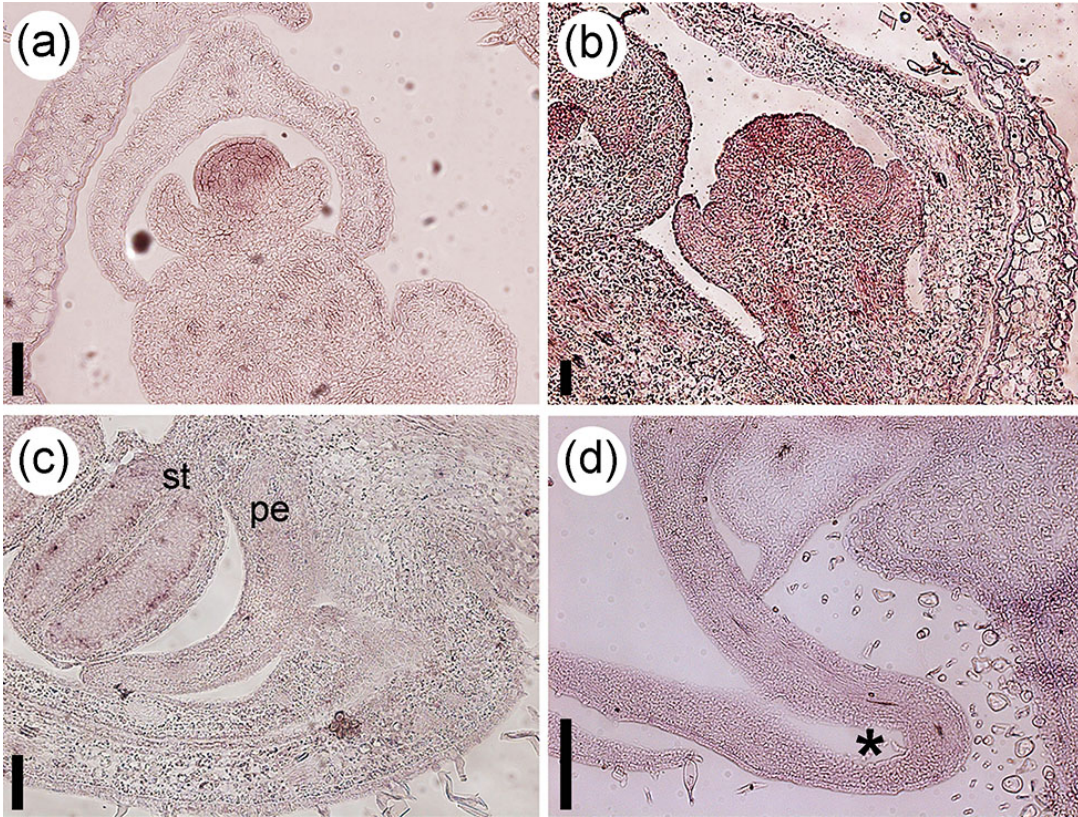

**Figure S5.** *AqKN* expression in developing floral meristems and petal primordia. (a) Stage 3 floral meristem. (b) Stage 5 floral meristem. (c) Stamen (st) and petal (pe) primordia in stage 8 floral meristem. (d) Petal spur (asterisk) in early stage 11 floral meristem. Size bars = 50  $\mu\text{m}$  in *a-b*, 100  $\mu\text{m}$  in *c*, 1 mm in *d*.

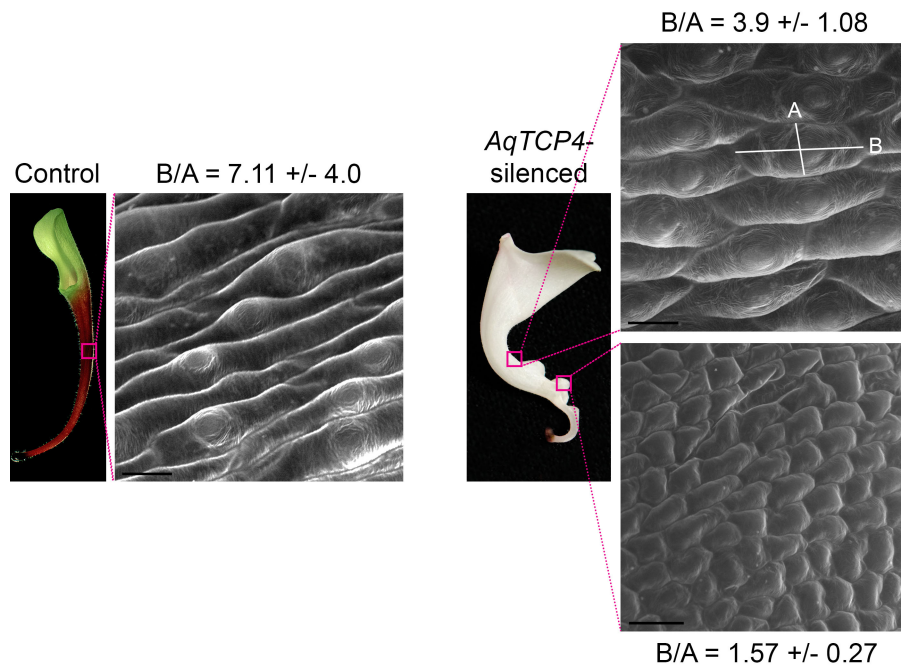

**Figure S6.** Cell morphology of control and *AqTCP4*-silenced petal spur epidermal cells. In control petals (left), the spur epidermal cells are greatly elongated with a long axis-to-short axis ratio (B/A) of 7.11 +/- 4.0. In *AqTCP4*-silenced petals (right), the undistorted regions of the spur have reduced elongation (top), with B/A = 3.9 +/- 1.08, but the cells in the epidermis of the outgrowths are much smaller and more isotropic (bottom), with B/A = 1.57 +/- 0.27. Cells were measured from 3 control petals and 6 silenced petals as described in Puzey et al. 2011. Size bars = 20  $\mu\text{m}$  in control and top silenced panel, = 50  $\mu\text{m}$  in bottom silenced panel.

**Table S1.** Primer sequences for *in situ* probe preparation and qRT-PCR

| <b><i>In situ</i> Probe Primers</b> |                                                                           |                    |                          |
|-------------------------------------|---------------------------------------------------------------------------|--------------------|--------------------------|
| <b>Locus</b>                        | <b>Primer Sequence</b>                                                    | <b>Full length</b> | <b>Hydrolyzed length</b> |
| <i>AqHIS4</i>                       | F 5' AAGGCGTGGTGGTGTAAAGCGTATCA<br>R 5' GAATTACAAGAAAGTAGTAGATCAGAATCCAAC |                    |                          |
| <i>AqTCP4</i>                       | F 5' TCCCATGCTGCTGCTACATC<br>R 5' TGAAGACAAATCCTCCTCCACCTC                | 344 bp             | 200 bp                   |
| <i>AqSTMI</i>                       | F 5' ATTATCCAAGGCTCTTAGCTTG<br>R 5' CCGGTCAAAAGCATCACCAC                  | 308 bp             | 200 bp                   |
| <i>AqKN</i>                         | F 5' TCAAGGAGGAGAAAAGGATTGG<br>R 5' CTCGTGGATCAATTCAGGAAC                 | 473 bp             | 75                       |
| <i>AqTCP4</i><br>(qRT-PCR)          | F 5' CCTGTTTAGGTTGGACTCTATGAGCTCTAC<br>R 5' GCATCAGCCATCTTTGTTGGTTACT     | 196 bp             | n/a                      |

**Table S2.** Floral developmental stages in *Aquilegia* and *Arabidopsis thaliana* (Ballerini *et al.*, 2011).

| <i>Arabidopsis</i> and <i>Aquilegia</i> floral developmental stages |                                       |                                                                                                                                                                                                                                                    |
|---------------------------------------------------------------------|---------------------------------------|----------------------------------------------------------------------------------------------------------------------------------------------------------------------------------------------------------------------------------------------------|
| Stage                                                               | <i>Arabidopsis</i>                    | <i>Aquilegia</i>                                                                                                                                                                                                                                   |
| 1                                                                   | Floral buttress arises                | Pre-floral meristem arises                                                                                                                                                                                                                         |
| 2                                                                   | Flower primordium forms               | Two bracteole meristem                                                                                                                                                                                                                             |
| 3                                                                   | Sepal primordia arise                 | Sepals arise (true floral meristem)                                                                                                                                                                                                                |
| 4                                                                   | Sepal overlie flower meristem         | Petal primordia arise                                                                                                                                                                                                                              |
| 5                                                                   | Petal and stamen primordia arise      | Stamen primordia begin arising                                                                                                                                                                                                                     |
| 6                                                                   | Sepals enclose bud                    | Sepals enclose bud, stamen primordia continue appearing                                                                                                                                                                                            |
| 7                                                                   | Long stamen primordia stalked at base | Carpels initiate, staminodia distinguishable, first whorl of stamens becoming stalked at base                                                                                                                                                      |
| 8                                                                   | Locules appear in long stamens        | Petal primordia begin to differentiate, first whorl of stamens begin to differentiate locules, folded carpels remain open                                                                                                                          |
| 9                                                                   | Petal primordia stalked at base       | Petals continue to differentiate and elongate to same length as first whorl stamens, all stamens differentiating, staminodia still filamentous, carpels elongated to same height as innermost stamens but remain open, staminodia begin to flatten |
| 10                                                                  | Petals level with short stamens       | Spur formation initiates on petals, all organs elongating                                                                                                                                                                                          |
| 11                                                                  | Stigmatic papillae appear             | Spur elongation continues, carpels close, stamens become apiculate                                                                                                                                                                                 |
| 12                                                                  | Petals level with long stamens        | Spurs and all floral organs reach final length                                                                                                                                                                                                     |
| 13                                                                  | Bud opens, petals visible, anthesis   | Sepals undergo final expansion and reflex, anthesis                                                                                                                                                                                                |

**Table S3.** Number of Illumina reads passing quality filter in each replicate

| sample                     | reads passing quality filter |
|----------------------------|------------------------------|
| 1mm blade (Bioreplicate 1) | 31,897,244                   |
| 1mm blade (Bioreplicate 2) | 24,424,763                   |
| 1mm blade (Bioreplicate 3) | 18,322,717                   |
| 1mm cup (Bioreplicate 1)   | 45,808,529                   |
| 1mm cup (Bioreplicate 2)   | 35,248,356                   |
| 1mm cup (Bioreplicate 3)   | 52,029,980                   |
| 3mm blade (Bioreplicate 1) | 67,593,830                   |
| 3mm blade (Bioreplicate 2) | 54,564,247                   |
| 3mm blade (Bioreplicate 3) | 27,589,892                   |
| 3mm cup (Bioreplicate 1)   | 58,419,420                   |
| 3mm cup (Bioreplicate 2)   | 66,893,683                   |
| 3mm cup (Bioreplicate 3)   | 23,460,945                   |
| 7mm cup (Bioreplicate 1)   | 31,767,957                   |
| 7mm cup (Bioreplicate 2)   | 42,649,438                   |
| 7mm cup (Bioreplicate 3)   | 54,111,734                   |
| total:                     | 634,782,735                  |

**Table S4.** Number of genes analyzed after filtering

|                                 | 1mmBC | 3mmBC |
|---------------------------------|-------|-------|
| predicted gene models in genome | 24823 | 24823 |
| genes with any reads in library | 24819 | 24817 |
| remove low abundant genes       | 16393 | 16515 |

**Table S5** genes significantly DE in each tissue

|           | 1mm Blade | 3mm Cup |
|-----------|-----------|---------|
| 1mm Cup   | 653       | 859     |
| 3mm Blade | -         | 1802    |

**Table S6** genes DE over time in cup

|         | 3mm Cup | 7mm Cup |
|---------|---------|---------|
| 1mm Cup | 859     | 2482    |
| 3mm Cup | -       | 1067    |
